# *vps25* mosaics display non-autonomous cell survival and overgrowth, and autonomous apoptosis

Hans-Martin Herz<sup>1</sup>, Zhihong Chen<sup>2</sup>, Heather Scherr<sup>2</sup>, Melinda Lackey<sup>2</sup>, Clare Bolduc<sup>2</sup> and Andreas Bergmann<sup>2,\*</sup>

Appropriate cell-cell signaling is crucial for proper tissue homeostasis. Protein sorting of cell surface receptors at the early endosome is important for both the delivery of the signal and the inactivation of the receptor, and its alteration can cause malignancies including cancer. In a genetic screen for suppressors of the pro-apoptotic gene *hid* in *Drosophila*, we identified two alleles of *vps25*, a component of the ESCRT machinery required for protein sorting at the early endosome. Paradoxically, although *vps25* mosaics were identified as suppressors of *hid*-induced apoptosis, *vps25* mutant cells die. However, we provide evidence that a non-autonomous increase of Diap1 protein levels, an inhibitor of apoptosis, accounts for the suppression of *hid*. Furthermore, before they die, *vps25* mutant clones trigger non-autonomous proliferation through a failure to downregulate Notch signaling, which activates the mitogenic JAK/STAT pathway. Hid and JNK contribute to apoptosis of *vps25* mutant cells. Inhibition of cell death in *vps25* clones causes dramatic overgrowth phenotypes. In addition, Hippo signaling is increased in *vps25* clones, and *hippo* mutants block apoptosis in *vps25* clones. In summary, the phenotypic analysis of *vps25* mutants highlights the importance of receptor downregulation by endosomal protein sorting for appropriate tissue homeostasis, and may serve as a model for human cancer.

**KEY WORDS:** Vps25, ESCRT, Protein sorting, MVB, Notch, Cell proliferation, Cell survival, Apoptosis

## INTRODUCTION

The regulation of tissue homeostasis involves the concerted action of several signaling pathways. An imbalance in this fine-tuned signaling network leads to overgrowth or apoptosis, and patterning defects in developing organisms. Hence, it is very important for the organism to hold excessive signaling in check for the proper regulation of tissue homeostasis.

One way to regulate signaling is by endocytosis of ligand-bound receptors. The signal for inducing endocytosis is provided by mono-ubiquitylation mediated by specific ubiquitin ligases (Haglund and Dikic, 2005; Hicke and Dunn, 2003). Endocytosis is either required for efficient signaling by bringing the activated receptor into close proximity of intracellular signaling components (Gonzalez-Gaitan, 2003; Le Roy and Wrana, 2005; Seto and Bellen, 2004), or it is needed to turn off signaling by sorting the ubiquitylated cargo at the early endosome into vesicles that pinch off from the limiting membrane into the lumen of emerging multi-vesicular bodies (MVB) (Babst, 2005; Felder et al., 1990; Gruenberg and Stenmark, 2004; Katzmann et al., 2002; Odorizzi et al., 1998; Raiborg et al., 2003). MVBs fuse with lysosomes for degradation of the internalized proteins.

The sorting process of ubiquitylated proteins at the early endosome into MVBs requires class E Vps (Vacuolar Protein Sorting) proteins, first identified in *Saccharomyces cerevisiae* (Raymond et al., 1992). Mutants of class E *vps* genes in yeast cause the accumulation of ubiquitylated proteins on the limiting membrane of early endosomes (Katzmann et al., 2002). Eleven class E Vps proteins participate in the formation of four protein complexes:

Hrs/Stam and three ESCRT (Endosomal Sorting Complex Required for Transport) protein complexes (reviewed by Babst, 2005). Hrs binds ubiquitylated receptors in early endosomes and delivers them to the ESCRT complexes, which catalyze the internalization of the ubiquitylated cargo into MVBs (Babst, 2005). This process separates the intracellular domain of activated signaling receptors from the cytosolic environment and, thus, inactivates them. *vps* mutants disrupt this process, causing aberrant endosomal structures (Raymond et al., 1992) in which activated receptors may continue to signal.

Because of the high conservation of class E Vps proteins, it is not surprising that these proteins have a similar function for protein sorting at the endosome in mammals (Babst, 2005). Additional functions of class E Vps proteins in mammals may include exosome secretion, virus budding, transcriptional control, cell cycle progression and apoptosis (de Gassart et al., 2004; Demirov and Freed, 2004; Kamura et al., 2001; Krempler et al., 2002; Pornillos et al., 2002; Schmidt et al., 1999; Wagner et al., 2003), indicating a broad range of Vps action for controlling tissue homeostasis. In addition, mutations of human *TSG101* (Vps23p) have been linked to a number of tumors, including cervical, breast, prostate and gastrointestinal cancers (Li and Cohen, 1996; Li et al., 1997; Lin et al., 1998; Sun et al., 1997).

In *Drosophila*, loss of the class E *vps* genes *hrs*, *erupted* (the *vps23* homolog encoding a component of ESCRT-I) and *vps25* (a component of ESCRT-II) leads to accumulation of the cell surface receptors Notch (N), Delta (DI), Thickveins and Egfr, consistent with a conserved role of these genes for endosomal protein sorting (Jekely and Rorth, 2003; Lloyd et al., 2002; Moberg et al., 2005; Thompson et al., 2005; Vaccari and Bilder, 2005). In the case of *erupted* and *vps25*, N accumulation stimulates the JAK/STAT pathway, which is known to induce cell proliferation in the eye disc (Chao et al., 2004; Reynolds-Kenneally and Mlodzik, 2005; Tsai and Sun, 2004), and gives rise to overgrowth phenotypes (Moberg et al., 2005; Thompson et al., 2005; Vaccari and Bilder, 2005).

<sup>1</sup>University of Heidelberg/ZMBH, Im Neuenheimer Feld 282, 69120 Heidelberg, Germany. <sup>2</sup>Department of Biochemistry and Molecular Biology, The University of Texas MD Anderson Cancer Center, 1515 Holcombe Boulevard – Unit 1000, Houston, TX 77030, USA.

\*Author for correspondence (e-mail: abergman@mdanderson.org)

Cell death in *Drosophila* is under the control of the pro-apoptotic genes *reaper*, *head involution defective* (*hid*; *W* – FlyBase) and *grim* (Cashio et al., 2005). The activation of these genes results in caspase activation, most notably Dronc (Nc – FlyBase), the Caspase-9 homolog. In living cells, Dronc is kept inactive by binding to Diap1 (*Drosophila* inhibitor of apoptosis protein 1; Thread – FlyBase) to prevent cell death (Bergmann et al., 2003; Meier et al., 2000). Reaper, Hid and Grim induce cell death through the binding to and stimulation of proteolytic degradation of Diap1 (Holley et al., 2002; Ryoo et al., 2002; Yoo et al., 2002). Dronc is released from Diap1 inhibition and, with the scaffolding protein Ark, forms the active apoptosome, which activates Drice (Ice – FlyBase) and Dcp-1, caspase-3-like proteins, inducing cell death.

Here, we extend the phenotypic characterization of *Drosophila vps25*, a component of the ESCRT-II complex. Paradoxically, although *vps25* mutants were recovered as recessive suppressors of *GMR-hid*-induced apoptosis, *vps25* mutant cells nevertheless die. Consistent with previous reports, before they die, they stimulate non-autonomous proliferation. However, non-autonomous proliferation does not account for the suppression of *GMR-hid*. Instead, *vps25* clones appear to enhance the apoptotic resistance of adjacent tissues by increasing Diap1 protein levels in a JAK/STAT-independent manner. Furthermore, *vps25* clones die through the activation of Hid and JNK, the inhibition of which causes dramatic overgrowth phenotypes in *vps25* mosaics. In addition, we detect inappropriate Hippo signaling in *vps25* clones, and *hippo* mutants block apoptosis in *vps25* clones. In conclusion, our studies present a mechanistic model by which the impairment of ESCRT function induces overgrowth, and may explain tumorous phenotypes, such as those caused by mutations of *TSG101* in humans.

## MATERIALS AND METHODS

### Isolation of *vps25*, *ark* and *hippo* alleles

For *GheF* screening (Xu et al., 2005), isogenized *FRT42D* P[y<sup>+</sup>] males were starved for 12 hours and then incubated with 25 mM EMS in 5% sucrose solution for 24 hours (Lewis and Bacher, 1968). After 3 hours of recovery, the males were mated to *GheF*; *FRT42D* P[w<sup>+</sup>] females and incubated at 25°C. F1 animals (32,000) were screened for suppression of *GMR-hid*. Two *vps25*, 37 *ark* and five *hippo* alleles were recovered.

### Stocks

*vps25*<sup>K2</sup> and *vps25*<sup>N55</sup> are described in the Results. *ark*<sup>H16</sup> carries a premature stop codon at residue 42, *ark*<sup>G8</sup> changes Cys346 to Trp (Srivastava et al., 2006). Both alleles are strong loss-of-function alleles of *ark*. *hippo*<sup>3D</sup> has a premature stop codon at residue 185 (M.L. and A.B., unpublished). *UAS-N<sup>DN</sup>*, *UAS-puc*, *UAS-upd* and *E(spl)m8 2.61-lacZ* were provided by Georg Halder and Jennifer Childress (MD Anderson Cancer Centre, Houston), *UAS-dMyc* by David Stein (University of Texas at Austin), *FRT42D arm-lacZ M(2)* by Graeme Mardon (Baylor College of Medicine, Houston) and the MARCM stock by Hugo Bellen (Baylor College of Medicine, Houston). The *GMR-hid*<sup>w+</sup> transgene was isolated by mobilizing *GMR-hid* using  $\Delta 2-3$  transposase. This transgene has lost the *w*<sup>+</sup> marker, but maintains the *hid* ORF.

### Mosaic analysis

Clones of genetically marked homozygous *vps25* mutant cells were obtained by FLP/FRT mitotic recombination (Xu and Rubin, 1993), using *ey-FLP* or *hs-FLP*. In each experiment, multiple clones of 10–20 eye imaginal discs were analyzed, unless otherwise noted. The MARCM technique (Lee and Luo, 2001) was used to induce UAS-based transgenes (*UAS-N<sup>DN</sup>*, *UAS-diap1*, *UAS-dMyc*, *UAS-puc*) in *vps25* clones.

### Immunohistochemistry

Eye-antennal and wing imaginal discs from third instar larvae were dissected and labeled using standard procedures with antibodies against the following antigens: Hid and Diap1 (gift of Hermann Steller and Hyung-Don Ryoo,

Rockefeller University, New York), Expanded (gift of Georg Halder, MD Anderson Cancer Centre, Houston), pSTAT (gift of Richard Sorrentino, MD Anderson Cancer Centre, Houston), Ubiquitin (Sigma), Notch and Delta (Developmental Studies Hybridoma Bank), BrdU (Becton Dickinson Biosciences), anti-cleaved Caspase-3 (Caspase-3\*, Cell Signaling Technology), pJNK and  $\beta$ -Gal (Promega). Secondary antibodies were from Jackson ImmunoResearch. The in situ cell death detection kit was from Roche. All images were taken with a Zeiss AxioImager equipped with ApoTome technology.

### DNA sequencing and transgenic rescue

To identify the mutations in the *vps25* alleles, PCR products of genomic DNA encompassing *CG14750* were sequenced. For transgenic rescue, genomic DNA containing the *CG14750* transcription unit, including the flanking regions up to the neighboring genes, was cloned into the transformation vectors pCaSpeR-hs and pUAST. For each vector, two independently obtained transgenic lines rescued the phenotypes of *vps25* mutants.

## RESULTS

### Isolation and characterization of recessive suppressors of *GMR-hid*

Overexpression of the pro-apoptotic gene *hid* under the control of the eye-specific Glass-Multimer-Reporter (*GMR-hid*) causes a strong eye-ablation phenotype as a result of the induction of apoptosis (Fig. 1A) (Grether et al., 1995). Using the recently described *GheF* (*GMR-hid ey-FLP*) method (Xu et al., 2005), we conducted an EMS-mutagenesis screen on chromosome arm 2R, aimed at identifying recessive suppressors of the *GMR-hid* eye-ablation phenotype. The *GheF* method takes advantage of the *ey-FLP/FRT* system, which induces homozygous mutant clones specifically in the eye by mitotic recombination (Newsome et al., 2000). Mutants that suppress the *GMR-hid* eye-ablation phenotype were selected for further analysis.

In the *GheF* screen, two mutants, *su(GMR-hid)K2* and *su(GMR-hid)N55* (referred to as *K2* and *N55*) were independently recovered as moderately strong recessive suppressors of the *GMR-hid* eye ablation phenotype (Fig. 1B,C). These mutants are homozygous lethal in trans to each other, and thus affect the same genetic function. To characterize these alleles, we induced *K2* and *N55* mosaics via the *ey-FLP/FRT* system in the eye (without simultaneous expression of *GMR-hid*). Surprisingly, homozygous mutant clones (marked by absence of red eye pigment; compare with Fig. 1D) were not recovered, although the twin-spots were (Fig. 1E,F), suggesting that the mosaic eyes are composed of wild-type and heterozygous tissue (marked by red eye pigment). Even more surprisingly, *K2* and *N55* mosaic eyes were larger than wild type (Fig. 1D–F). Thus, the mutant clones do not contribute to the adult eye tissue, but appear to be able to induce overgrowth in wild-type tissue. Analysis of third instar eye-antennal *K2* and *N55* mosaic discs confirms these conclusions. These discs are overgrown and disorganized when compared with wild type (Fig. 1G–I). At this stage, mutant clones are detectable (marked by absence of GFP labeling in Fig. 1G,H). However, as shown below, they are eliminated by apoptosis.

These results pose an apparent paradox. Although we have identified *K2* and *N55* as being recessive suppressors of *GMR-hid*, the mutant clones do not survive. We determined whether *K2* and *N55* mutant clones contribute to the suppression of *GMR-hid* by clonal analysis. However, the *GMR-hid* transgene used for *GheF* screening is marked with *w*<sup>+</sup>, and does not allow a clonal analysis based on red/white pigment selection in eyes. Thus, we generated a *GMR-hid* transgene that has lost *w*<sup>+</sup>, termed *GMR-hid*<sup>w+</sup>, allowing the determination of the genetic identity of the rescued tissue of *GMR-hid*<sup>w+</sup> in *K2* and *N55* mosaics. As a positive control, the strong

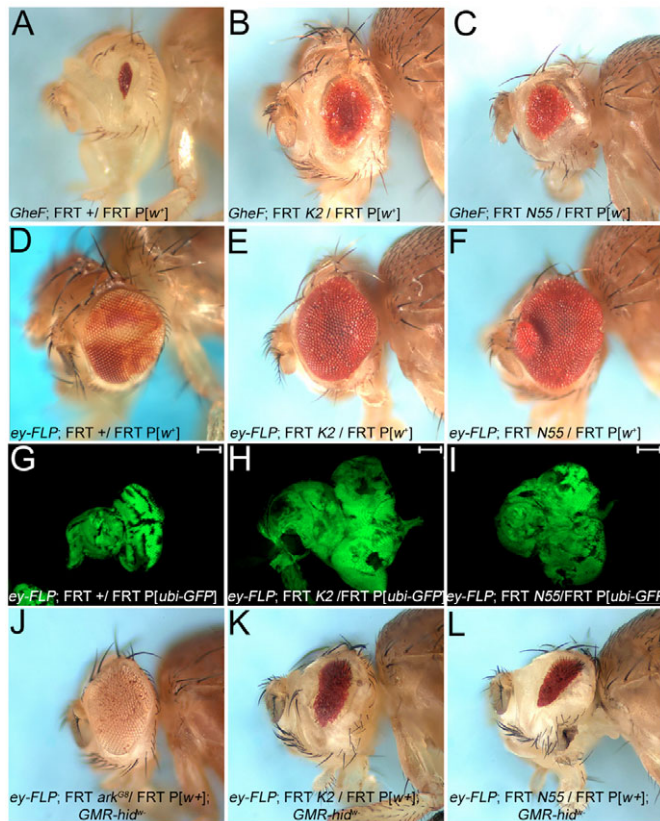

**Fig. 1. Isolation and characterization of *K2* and *N55* alleles.**

Genotypes are indicated in each panel. FRT, FRT42D. (A) The unmodified *GMR-hid ey-FLP* (*GheF*) eye-ablation phenotype. (B,C) *K2* (B) and *N55* (C) alleles are moderate suppressors of the *GheF*-eye phenotype. (D-F) Adult eyes of *ey-FLP*-induced mosaics of wild-type (D), and *K2* (E) and *N55* (F). *K2* and *N55* mosaic eyes lack mutant clones (marked by the absence of red pigment) and are overgrown. (G-I) Eye-antennal discs from third instar larvae of *K2* (H) and *N55* mosaics (I) are overgrown and disorganized compared with wild type (G). Scale bar: 100  $\mu$ m. (J-L) Non-autonomous suppression of *GMR-hid*<sup>w-</sup> in *K2* and *N55* mosaics. (J) Control: in *ark* mosaics, largely *ark* mutant clones (marked by an absence of eye pigment) suppress *GMR-hid*<sup>w-</sup>. (K,L) In *K2* (K) and *N55* (L) mosaics, the suppression of *GMR-hid*<sup>w-</sup> is mediated by wild-type tissue (red pigment). *K2* and *N55* clones do not contribute.

suppression of *GMR-hid*<sup>w-</sup> by a mutant of *ark*, an essential component of the cell death pathway, is largely mediated by *ark* mutant tissue (marked by absence of eye pigment in Fig. 1J). By contrast, in *K2* and *N55* mosaics, the rescued tissue of *GMR-hid*<sup>w-</sup> is genetically wild type or heterozygous (marked by red pigment in Fig. 1K,L), suggesting that *K2* and *N55* mutant tissue does not contribute to the suppression of *GMR-hid*<sup>w-</sup>. Therefore, because the surviving wild-type tissue is exposed to *GMR*-driven *hid* expression, this tissue may have an increased apoptotic resistance induced by *K2* and *N55* mutant clones. Thus, these are unprecedented phenotypes, which merit further analysis.

### ***K2* and *N55* mutant clones die, but induce non-autonomous proliferation**

To examine the *K2* and *N55* mutant phenotypes in more detail, we performed TUNEL and BrdU labeling as assays for apoptosis and cell proliferation, respectively, in imaginal discs of third instar larvae. TUNEL labeling was increased in *N55* mutant clones (Fig. 2A-C),

consistent with the observed lack of mutant clones in the adult eye (Fig. 1E,F). *N55* clones can grow to a fairly large size, suggesting that they are not growth impaired (Fig. 2A-C). However, these clones are completely removed by apoptosis during pupal stages (data not shown). Similar data were obtained for *K2* (data not shown).

Interestingly, cell proliferation in *N55* mosaics, as demonstrated by BrdU incorporation, is significantly increased in tissue adjacent to the mutant clones. This non-autonomous cell proliferation is best visible in wing imaginal discs, where *N55* clones appear to be the origin for the increased proliferation of adjacent tissue (Fig. 2D-F); wing discs with wild-type clones show a homogenous distribution of proliferating cells both within and outside of the clones (Fig. G-I). Similar data were obtained in eye-antennal imaginal discs (data not shown).

In addition to the apoptotic and proliferation phenotypes, *N55* mutant clones fail to differentiate. *Elav* (a neuronal differentiation marker) labeling demonstrates that *N55* cells are unable to differentiate (data not shown).

In summary, these analyses reveal that the wild-type function of *K2* and *N55* is required for the appropriate control of apoptosis, cell proliferation and cell differentiation. The overgrowth phenotype in *K2* and *N55* mosaics (Fig. 1H,I) can most likely be explained by emission of signaling molecules from the mutant cells initiating non-autonomous proliferation in the adjacent wild-type tissue.

### ***K2* and *N55* are mutants of the *Drosophila vps25* homolog**

To understand the molecular cause of these phenotypes, we identified the mutant gene in *K2* and *N55*. By P-element (Zhai et al., 2003) and deficiency mapping, *K2/N55* was located to cytological region 44D4-44D5 on the polytene map. Both alleles failed to complement the lethality of a P-element-induced mutation (*1(2)44Db<sup>k08904</sup>*) which is inserted in the gene *CG14750*. DNA sequencing of *CG14750* of *K2* revealed a transversion from T to A in the second base of the only intron, presumably causing a splicing defect and, subsequently, premature termination of translation by an in-frame stop codon in the intron. *CG14750* of *N55* carries a premature termination codon at amino acid 93 (Fig. 2J). Genomic constructs of *CG14750* rescue the phenotypes associated with *K2* and *N55* mutants (data not shown), suggesting that *K2* and *N55* affect *CG14750*.

A BLAST search identified *CG14750* as the *Drosophila* homolog of *vps25* in *S. cerevisiae*. It is a member of the class E Vps proteins (Raymond et al., 1992), and a component of ESCRT-II, which functions to catalyze the feeding of ubiquitylated transmembrane receptors into intraluminal vesicles of MVBs, targeting them for degradation in lysosomes. From now on, we refer to *K2* and *N55* as *vps25<sup>K2</sup>* and *vps25<sup>N55</sup>*, respectively. *Drosophila vps25* encodes a protein of 174 amino acids and contains two winged helix (WH) domains, WHA and WHB (Fig. 2J). Because both WHA and WHB are essential for ESCRT-II function (Hierro et al., 2004; Teo et al., 2004), and because of the molecular lesions of *vps25<sup>K2</sup>* and *vps25<sup>N55</sup>* (Fig. 2J), these alleles are likely to be very strong hypomorphic alleles, if not null alleles. Recently, two papers reported the isolation of *vps25* mutants in entirely different genetic screens (Thompson et al., 2005; Vaccari and Bilder, 2005). Our phenotypic characterization of *vps25* is largely consistent with these studies.

### **Increased Notch and JAK/STAT signaling in *vps25* mosaics**

In yeast, *vps25* mutants cause aberrant endosomal structures in which ubiquitylated proteins accumulate (Katzmann et al., 2002). In *Drosophila vps25* mutant clones, similar abnormal endosomal



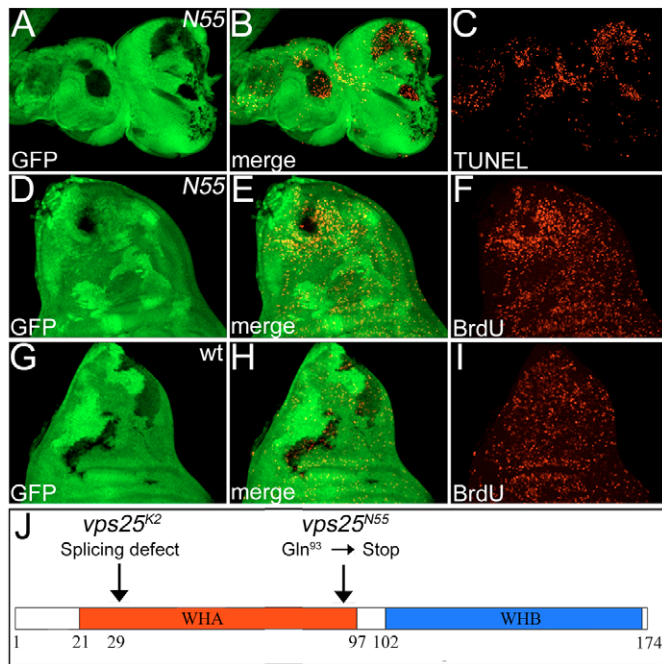

**Fig. 2. TUNEL and BrdU analysis of *N55* mosaics.** (A-C) Increased TUNEL-positive cell death in *N55* mutant clones (genotype: *ey-FLP; FRT42D N55/FRT42D P(ubi-GFP)*) of eye-antennal imaginal discs from third instar larvae. *N55* clones are marked by the absence of GFP. (D-F) BrdU labeling of *N55* mosaic wing imaginal discs. Note the increased proliferation in tissue adjacent to *N55* clones (*hs-FLP; FRT42D N55/FRT42D P(ubi-GFP)*). (G-I) BrdU labeling of wild-type (wt) clones (*hs-FLP; FRT42D +/FRT42D P(ubi-GFP)*) in wing imaginal discs serves as a control to D-F. BrdU incorporation is homogeneous inside and outside the clones. (J) Schematic outline of the Vps25 protein and the molecular lesions in *Vps25*<sup>K2</sup> and *Vps25*<sup>N55</sup>. WHA and WHB are winged-helix domains A and B.

structures have been observed and ubiquitin immunoreactivity is strongly increased (Fig. 3A-C) (Thompson et al., 2005; Vaccari and Bilder, 2005) (note that *vps25* clones are positively marked by GFP using the MARCM technique). This analysis suggests that in *vps25* mutant cells, ubiquitylated proteins accumulate, and are presumably not degraded.

Cell surface receptors are able to signal after endocytosis as long as they are not incorporated into MVBs (Gonzalez-Gaitan, 2003; Seto and Bellen, 2004), because their intracellular domains are still exposed to the cytosol in the early endosome. Because *vps25* mutants are likely to impair MVB function, these receptors may still continue to signal. Thus, the proliferation phenotype of *vps25* mosaics may be explained by continued signaling activity. Consistently, N protein and its ligand D1 accumulate in *vps25* clones (Fig. 3D-I), resulting in increased N activity as shown by the N reporter *E(spl)m8 2.61-lacZ* (Fig. 3J-L) (Thompson et al., 2005; Vaccari and Bilder, 2005). However, not all known target genes of N are upregulated in *vps25* clones. The expression of *cut*, another N target, is unaltered in *vps25* mutant clones in wing discs (data not shown). N is able to promote global growth in the eye by inducing *unpaired* (*upd; os* – FlyBase) expression (Chao et al., 2004; Reynolds-Kenneally and Mlodzik, 2005; Tsai and Sun, 2004). Upd is a ligand of Domeless, the receptor of the JAK/STAT signaling pathway (Brown et al., 2001). Consistently, non-autonomous STAT activity is stimulated outside of *vps25* mutant clones in eye discs

(Fig. 3M-O). In summary, these data link N activation with the mitogenic activity of the JAK/STAT pathway, and this may be the cause of non-autonomous proliferation in *vps25* mosaics.

### N is required for non-autonomous proliferation in *vps25* mosaics

To determine a genetic requirement of N signaling for non-autonomous proliferation in *vps25* mosaics, we expressed a dominant-negative N (*N*<sup>DN</sup>) transgene (Sen et al., 2003) in *vps25* clones (referred to as *vps25/N*<sup>DN</sup>) using MARCM (Lee and Luo, 2001). STAT activity in *vps25/N*<sup>DN</sup> eye mosaics was strongly reduced or absent compared with in *vps25* clones (Fig. 4A-C). Furthermore, BrdU-positive cell proliferation was not significantly increased in *vps25/N*<sup>DN</sup> mosaics (Fig. 4D-F). Consistently, eye imaginal discs obtained from *vps25/N*<sup>DN</sup> mosaics are normal in shape and size (data not shown). These observations suggest that the increased N activity in *vps25* clones accounts for the non-autonomous proliferation phenotype of *vps25* mosaics through activation of the JAK/STAT pathway. A similar conclusion was obtained by analyzing *vps25* mosaics in a heterozygous *Stat92E* mutant background (Vaccari and Bilder, 2005). Interestingly, D1 protein does not accumulate in *vps25/N*<sup>DN</sup> clones (Fig. 4G-I). This observation suggests that N controls D1 protein levels in *vps25* clones.

We determined whether non-autonomous proliferation mediated by Upd and JAK/STAT signaling is sufficient for the suppression of *GMR-hid*, as observed for *vps25* mosaics (Fig. 1B,C). However, although overexpression of *upd* in the fly eye gives rise to enlarged eyes (Muller et al., 2005), it is not sufficient for suppression of *GMR-hid* (Fig. 4M,N). Thus, the suppression of *GMR-hid* in *vps25* mosaics is not caused by non-autonomous proliferation through Upd signaling. Another mechanism may account for the observed suppression (see below).

N signaling has also been implicated in inducing cell death in eye imaginal discs (Miller and Cagan, 1998). Thus, we tested whether increased N signaling accounts for the cell death phenotype of *vps25* clones. However, *vps25/N*<sup>DN</sup> clones labeled with activated caspase-3 (Caspase-3\*) antibody were indistinguishable from *vps25* clones (Fig. 4J-L). Similar results were obtained by TUNEL labeling (data not shown). Thus, although N induces non-autonomous proliferation in *vps25* mosaics, it is not responsible for the apoptotic phenotype of *vps25* clones.

We also tested the possibility that the activation of cell death might activate N signaling, and thus induce compensatory proliferation. To address this issue, we blocked cell death by the expression of *diap1* in *vps25* mutant clones (see below). However, pSTAT activity and cell proliferation was still evident under these conditions (data not shown), establishing that the activation of the N pathway and the induction of cell death in *vps25* clones are independent of each other.

### Non-autonomous survival through upregulation of Diap1 protein

Because N signaling does not induce cell death in *vps25* clones, we analyzed the underlying cause of the apoptotic phenotype. *vps25* clones contain increased protein levels of the cell death inducer Hid (Fig. 5A-C). Hid, as well as Reaper and Grim, induce apoptosis by stimulating ubiquitin-mediated degradation of Diap1, an inhibitor of the caspase Dronc (Holley et al., 2002; Meier et al., 2000; Ryoo et al., 2002; Yoo et al., 2002). Indeed, Diap1 protein levels were markedly reduced in *vps25* mutant clones (Fig. 5D-F), suggesting that Diap1 no longer inhibits Dronc.

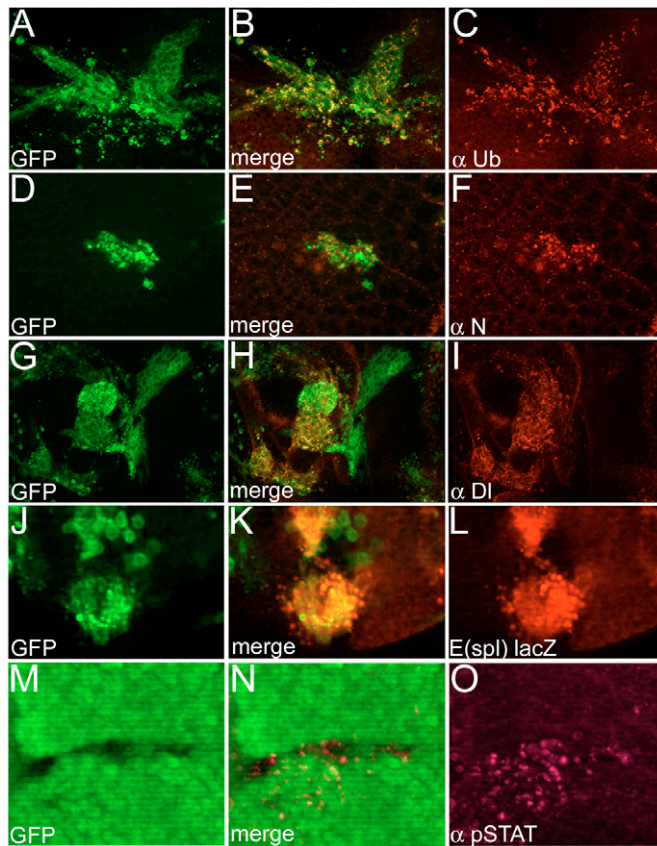

**Fig. 3. Accumulation of ubiquitin, N and DI in *vps25* clones, and increased pSTAT immunoreactivity adjacent to *vps25* clones.** (A-C) Accumulation of ubiquitin in *vps25* clones (genotype: *hs-FLP UAS-GFP; FRT42D vps25<sup>N55</sup>/FRT42D tub-Gal80; tub-Gal4*). Note *vps25* clones are positively marked with GFP using the MARCM technique (Lee and Luo, 2001). (D-F) Accumulation of N in GFP-marked *vps25* clones (genotype as in A-C). (G-I) Accumulation of DI in GFP-marked *vps25* clones (genotype as in A-C). (J-L) Increased N activity in GFP-marked *vps25* clones (*hs-FLP UAS-GFP; E[spl]m8 2.61-lacZ FRT42D vps25<sup>N55</sup>/FRT42D tub-Gal80; tub-Gal4*). (M-O) Increased STAT activity inside and outside of *vps25* clones (*ey-FLP; FRT42D vps25<sup>N55</sup>/FRT42D P[ubi-GFP]*) by anti-pSTAT labeling. Clones are marked by the absence of GFP.

Strikingly, however, Diap1 immunoreactivity is increased in wild-type cells immediately abutting *vps25* clones (Fig. 5D-F), suggesting that *vps25* clones also promote non-autonomous cell survival. *GMR-hid* is sensitive to altered levels of Diap1 (Hay et al., 1995). Thus, the non-autonomous increase of Diap1 protein is likely to promote the suppression of *GMR-hid* in *vps25* mosaics (Fig. 1B,C). This activity is independent of Upd signaling because overexpression of *upd* does not alter Diap1 protein levels (data not shown) and does not suppress *GMR-hid* (Fig. 4N). It is currently not known which signaling mechanism causes non-autonomous survival by regulating Diap1 protein levels.

### Blocking cell death induces massive overgrowth of *vps25* mosaics

It has recently been demonstrated that dying cells are able to induce compensatory proliferation in neighboring cells (Huh et al., 2004; Perez-Garijo et al., 2004; Ryoo et al., 2004). Thus, we tested whether compensatory proliferation contributes to non-autonomous proliferation in *vps25* mosaics. If it does, then the

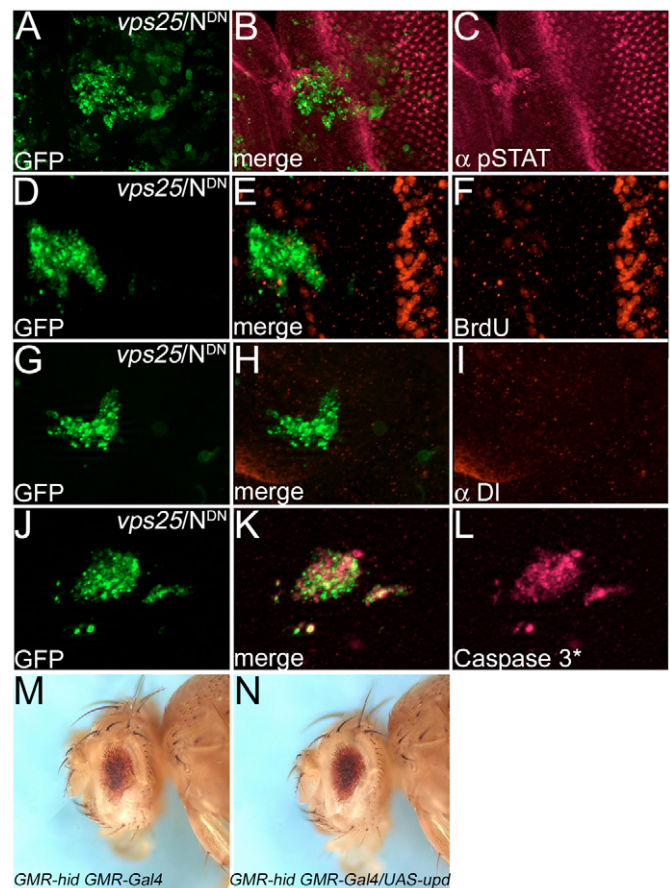

**Fig. 4. N is required for non-autonomous proliferation of *vps25* mosaics, but not for apoptosis.** All *vps25* clones expressing  $N^{DN}$  (*vps25/N<sup>DN</sup>*) were labeled with GFP using MARCM. (A-I) *vps25/N<sup>DN</sup>* clones have reduced levels of pSTAT (A-C), non-autonomous cell proliferation (BrdU labeling in D-F), and DI (G-I). The strong BrdU signal in E,F is due to the second mitotic wave. (J-L) Caspase-3\*-positive apoptosis is unchanged in *vps25/N<sup>DN</sup>* clones. Genotype in A-L: *hs-FLP UAS-GFP; FRT42D vps25<sup>N55</sup> UAS-N<sup>DN</sup>/FRT42D tub-Gal80; tub-Gal4*. (M) The unmodified *GMR-hid GMR-Gal4* eye-ablation phenotype. (N) Overexpression of *upd* is not sufficient to suppress *GMR-hid GMR-Gal4*. Genotype: *GMR-hid GMR-Gal4/UAS-upd*.

inhibition of apoptosis either through the expression of Diap1 in *vps25* clones (*vps25/Diap1*) or in *vps25 ark* double mutants (using an *ark* null allele, see Materials and methods) is expected to reduce proliferation and subsequently to suppress the overgrowth phenotype of *vps25* mosaics. However, non-autonomous proliferation is still observed in *vps25/Diap1* mosaics (Fig. 5G-I) and in *vps25 ark* mosaics (data not shown), suggesting that compensatory proliferation does not contribute significantly to the non-autonomous proliferation of *vps25* mosaics. By contrast, eye-antennal discs of *vps25/Diap1* mosaics are extremely overgrown and can be five times as large as wild-type discs (Fig. 5J). In addition, *vps25/Diap1* and *vps25 ark* clones occupy a large fraction of the eye disc (Fig. 5J-O), suggesting that *vps25* clones have no intrinsic growth disadvantage over wild-type tissue if cell death is blocked. The adult eye of *vps25 ark* mosaics is severely overgrown and folded (Fig. 5P). Thus, inhibiting cell death in *vps25* clones gives rise to an even stronger overgrowth phenotype, as has also been observed following expression of the caspase inhibitor P35 (Thompson et al., 2005).



## Hid and JNK contribute to the elimination of *vps25* mutant clones

Caspase-3\* labeling reveals that cell death is completely blocked in *vps25/Diap1* clones (Fig. 5J-L). Surprisingly, Caspase-3\* activity is still detectable in *vps25 ark* double mutant clones (Fig. 5M-O), suggesting that although *ark*, an essential component of the cell

death pathway, is mutant, *vps25 ark* double mutant cells still die. This is also confirmed by the observation that *vps25 ark* clones (marked by absence of eye pigment) cannot be recovered in adult eyes of *vps25 ark* mosaics (Fig. 5P). *Diap1* inhibits both initiator (*Dronc*) and Caspase-3-like caspases (*Drice*), whereas *Ark* directly only activates *Dronc* (Cashio et al., 2005). Thus, an alternative cell death pathway is operating in *vps25* clones that can induce caspase-3-like activity independently of *Ark*.

We considered Jun N-terminal Kinase (JNK, encoded by *basket* in *Drosophila*), signaling as a candidate for the alternative cell death pathway. JNK activation occurs under stress conditions, and can induce apoptosis (Adachi-Yamada et al., 1999; Adachi-Yamada and O'Connor, 2002). We found increased levels of activated JNK in *vps25* clones (Fig. 6A-C). It was previously shown that inactivation of *Diap1* can induce JNK activation (Kuranaga et al., 2002; Ryoo et al., 2004). Thus, we tested whether this applies to *vps25* clones as well. However, JNK activity is not appreciably altered in *vps25/Diap1* clones (Fig. 6D-F), excluding the possibility that JNK activation occurs as a result of *Diap1* inactivation. To determine a requirement of JNK for the apoptotic phenotype, we inhibited JNK in *vps25* clones by overexpressing Puckered (*vps25/Puc*), a phosphatase that dephosphorylates JNK. However, Caspase-3\* activity is still detectable in *vps25/Puc* clones (Fig. G-I). This caspase activity may be derived from *Hid* activity, as *hid* is expressed in *vps25/Puc* clones (data not shown). Thus, we expressed *Puc* in *vps25 ark* double mutant clones. In *vps25 ark/Puc* clones, Caspase-3\* activity is mostly blocked (Fig. 6J-L), and *vps25 ark/Puc* mosaic discs are severely overgrown (Fig. 6J), similar to *vps25/Diap1* eye discs (Fig. 5J). Taken together, these observations implicate *Hid/Diap1/Dronc/Ark* and JNK signaling as being contributing factors to the apoptotic phenotype of *vps25* mutant clones. Interestingly, we still detect Caspase-3\* activity at the clonal margin of *vps25 ark/Puc* clones, suggesting that a third cell death pathway may operate in *vps25* clones. Alternatively, JNK inhibition by *Puc* may be incomplete.

## Hippo signaling, but not cell competition, controls apoptosis in *vps25* clones

Which process controls the apoptotic phenotype of *vps25* mutants? One possibility is cell competition. Cell competition was originally described in studies using *Minute (M)* mutations, in which faster growing cells ( $M^+/M^+$ ) outcompete neighboring slow-growing cells ( $M^-/M^+$ ) by inducing apoptosis (reviewed by Abrams, 2002). Thus, we analyzed *vps25* clones in a *M* background. However, although *vps25* clones are larger in a *M* background than in a wild-type background (Thompson et al., 2005), they are still Caspase-3\* positive and undergo apoptosis (Fig. 7A-C). In addition, it was recently shown that *Drosophila Myc* (Dm – FlyBase) protein levels are crucial for cell competition (de la Cova et al., 2004; Moreno and Basler, 2004). An imbalance of *Drosophila Myc* protein levels between neighboring cells induces cell competition, outcompeting cells with lower *Myc* levels by apoptosis. However, expression of *Drosophila Myc* in *vps25* clones (*vps25/dMyc*) does not significantly change Caspase-3\* activity (Fig. 7D-F). These data illustrate that cell competition is not an important contributor for cell death in *vps25* clones.

In recent years, the Hippo signaling pathway has emerged as an important regulator of tissue growth by controlling cell proliferation and apoptosis (Edgar, 2006; Harvey et al., 2003; Pantalacci et al., 2003; Udan et al., 2003; Vidal and Cagan, 2006; Wu et al., 2003). Thus, we tested whether Hippo activity is altered in *vps25* clones. Expanded (*Ex*) is a useful marker for Hippo activity, and is inversely

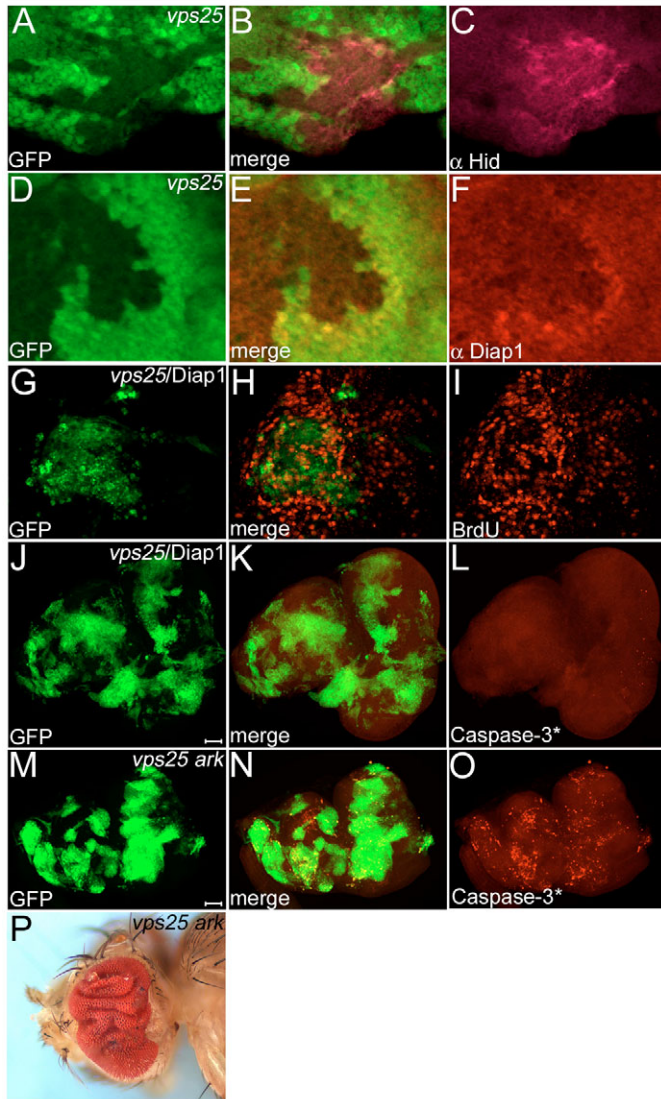

**Fig. 5. Non-autonomous increase of *Diap1* protein levels, and evidence of two cell death pathways.** (A-C) Increased levels of *Hid* protein in *vps25* clones (genotype: *ey-FLP; FRT42D vps25<sup>N55</sup>/FRT42D P[ubi-GFP]*) of third instar eye discs. Clones are marked by the absence of GFP. (D-F) *Diap1* protein levels are reduced in, and increased adjacent to, *vps25* clones (genotype as in A-C). (G-I) BrdU labeling of GFP-marked *vps25/Diap1* mosaics (*hs-FLP UAS-GFP/UAS-Diap1; FRT42D vps25<sup>N55</sup>/FRT42D tub-Gal80; tub-Gal4*). Overexpression of *Diap1* does not block non-autonomous proliferation. (J-L) Caspase-3\* labeling of GFP-marked *vps25<sup>N55</sup>/Diap1* mosaics. Caspase-3\* is completely blocked. Genotype as in G-I. Scale bar: 100  $\mu$ m. (M-O) Caspase-3\* labeling of GFP-marked *vps25 ark* double mutant mosaics. Caspase-3\* dependent cell death is detectable in *vps25 ark* clones (*hs-FLP UAS-GFP; FRT42D vps25<sup>N55</sup> ark<sup>H16</sup>/FRT42D tub-Gal80; tub-Gal4*). Scale bar: 100  $\mu$ m. (P) Adult eyes of *ey-FLP*-induced mosaics of *vps25 ark* double mutants are severely overgrown and folded. Note that *vps25 ark* clones (*ey-FLP; FRT42D vps25<sup>N55</sup> ark<sup>H16</sup>/FRT42D P[w<sup>+</sup>]*) are absent (marked by lack of red pigment).

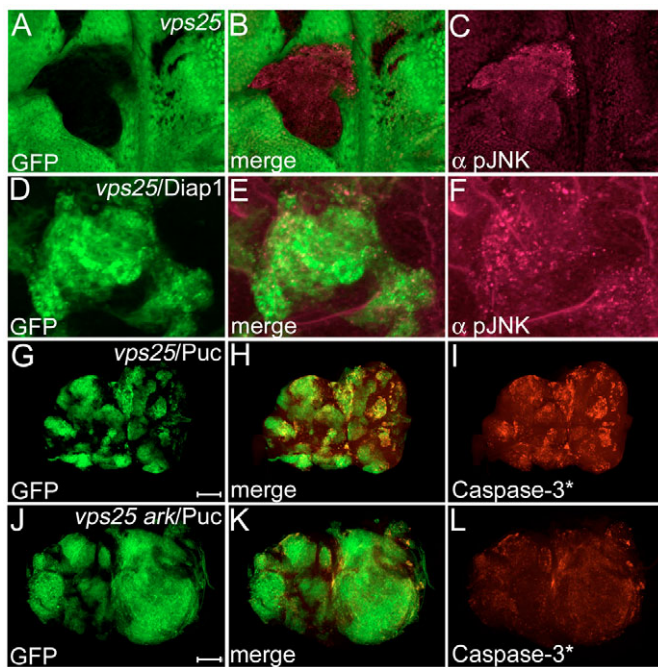

**Fig. 6. JNK contributes to the apoptotic phenotype of *vps25* clones.** (A-C) Increased JNK activity in *vps25* clones (genotype: *ey-FLP; FRT42D vps25<sup>N55</sup>/FRT42D P[ubi-GFP]*) shown by anti-pJNK labeling. Clones are marked by absence of GFP. (D-F) pJNK labeling of GFP-marked *vps25/Diap1* mosaics (*hs-FLP UAS-GFP/UAS-Diap1; FRT42D vps25<sup>N55</sup>/FRT42D tub-Gal80; tub-Gal4*). (G-I) Caspase-3\*-labeling of GFP-marked *vps25/Puc* mosaics (*hs-FLP UAS-GFP; FRT42D vps25<sup>N55</sup>/FRT42D tub-Gal80; tub-Gal4/UAS-puc*). Scale bar: 100  $\mu$ m. (J-L) Caspase-3\*-labeling of GFP-marked *vps25 ark/Puc* mosaics (*hs-FLP UAS-GFP; FRT42D vps25<sup>N55</sup> ark<sup>G8</sup>/FRT42D tub-Gal80; tub-Gal4/UAS-puc*). Note, the clones marked with GFP are severely enlarged. Scale bar: 100  $\mu$ m.

correlated with Hippo activity such that low Ex levels are indicative of high Hippo activity (Hamaratoglu et al., 2006). Ex protein levels are low in *vps25* clones (Fig. 7G-I, arrow), indicating that they contain high Hippo activity. Interestingly, in *vps25 hippo* double mutants, Caspase-3\* is almost completely blocked (Fig. 7J-L), suggesting that Hippo signaling either directly or indirectly controls apoptosis in *vps25* mutant cells. The cause for increased Hippo signaling in *vps25* clones is unknown. It is possible that a receptor that controls Hippo activity is deregulated at the *vps25* endosome (see Discussion).

## DISCUSSION

The inactivation of signaling pathways is as important for appropriate tissue homeostasis as its activation. Interference with the inactivation process often gives rise to malignant phenotypes, including cancer. Several strategies to restrict signaling exist, including receptor sequestration, receptor inactivation, production of inhibitory signaling proteins and inactivation of intracellular signaling proteins. The phenotypic analysis of *vps25* mutants highlights the importance of receptor downregulation by endosomal protein sorting. Lack of *vps25* function causes at least three phenotypes: non-autonomous proliferation, non-autonomous resistance to cell death and autonomous apoptosis. The cause of these phenotypes and the potential role of class E Vps proteins for tumorigenesis will be discussed.

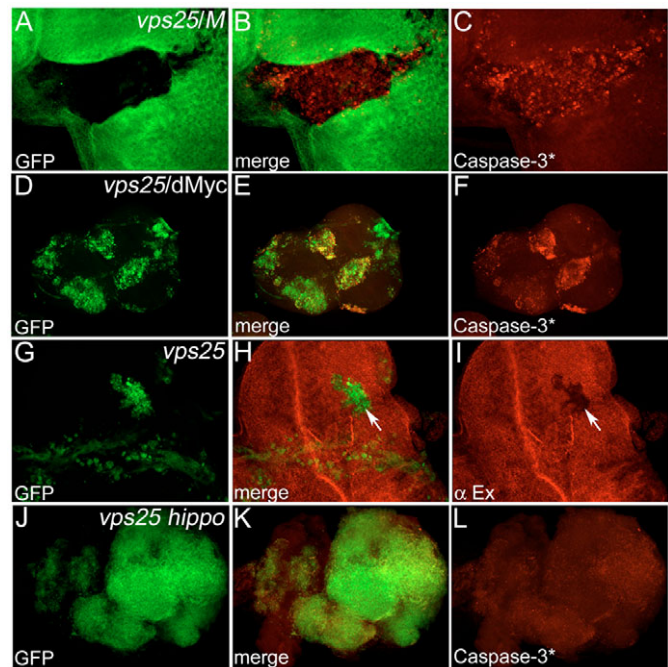

**Fig. 7. Increased Hippo signaling, but not cell competition, controls apoptosis in *vps25* clones.** (A-C) Caspase-3\*-labeling of *vps25* mosaics (genotype: *ey-FLP; FRT42D vps25<sup>N55</sup>/FRT42D arm-lacZ M(2)*) in a *Minute (M)* background. Caspase-3\* activity is unaffected. Clones are marked by the absence of  $\beta$ -Gal staining. (D-F) Caspase-3\*-labeling of GFP-marked *vps25/dMyc* mosaics (*hs-FLP UAS-GFP; FRT42D vps25<sup>N55</sup>/FRT42D tub-Gal80; tub-Gal4/UAS-dMyc*). Caspase-3\* activity is unaffected. (G-I) Expanded (Ex) labeling of GFP-marked *vps25* mosaics (*hs-FLP UAS-GFP; FRT42D vps25<sup>N55</sup>/FRT42D tub-Gal80; tub-Gal4*). Ex protein levels are reduced in *vps25* clones (arrow), indicating increased Hippo activity. (J-L) Caspase-3\*-labeling of GFP-marked *vps25 hippo* double mutant mosaics (*hs-FLP UAS-GFP; FRT42D vps25<sup>N55</sup> hippo<sup>3D</sup>/FRT42D tub-Gal80; tub-Gal4*). Caspase-3\* activity is blocked.

## Non-autonomous proliferation by Notch signaling in *vps25* mosaics

*Vps25* is a component of the ESCRT-II complex required for internalization of cell surface receptors into MVBs at the early endosome (Babst, 2005). The signal for protein sorting into MVBs is provided by mono-ubiquitylation (Haglund and Dikic, 2005; Hicke and Dunn, 2003). In yeast, *vps25* mutants cause aberrant endosomal structures and the accumulation of ubiquitylated proteins (Katzmann et al., 2002). We, and others (Thompson et al., 2005; Vaccari and Bilder, 2005), have observed a similar phenotype in *vps25* clones in *Drosophila*, suggesting the conserved function of *vps25*.

The lack of appropriate protein sorting at early endosomes in *vps25* clones causes the accumulation of cell surface receptors including N and Dl. Our genetic analysis using a dominant-negative N transgene ( $N^{DN}$ ; Fig. 4) suggests that the strong overgrowth phenotype of *vps25* mosaics is largely due to inappropriate N signaling, which is known to induce proliferation non-autonomously through activation of the JAK/STAT pathway (Chao et al., 2004; Harrison et al., 1998; Reynolds-Kenneally and Mlodzik, 2005; Tsai and Sun, 2004).

It is unclear whether N exerts this function in a ligand-dependent manner. Dl protein also accumulates in *vps25* clones, and endocytosis of Dl is required for N activation (Le Borgne et al., 2005). Thus, blocking MVB formation in *vps25* clones may lead to



the accumulation of active DI, resulting in increased N activity. However, we also show that N is required for DI accumulation in *vps25* clones (Fig. 4I). Therefore, DI accumulation is either directly or indirectly the result of increased N activity in *vps25* clones. This conclusion infers that N activation occurs before DI accumulation and would argue in favor of a ligand-independent mechanism for N activation in *vps25* clones, although DI may be required for maintaining N activity. N activity is also controlled by several proteolytic cleavages (Le Borgne et al., 2005), which lead to translocation of the intracellular domain of N to the nucleus where it regulates the expression of target genes. Thus, a potential ligand-independent mode of N activation may include inappropriate cleavage of N at the *vps25* endosome. Further studies are needed to clarify this point.

Mutations in *erupted*, the *vps23* homolog that encodes a component of ESCRT-I, give rise to similar phenotypes to those observed for *vps25* (Moberg et al., 2005; Thompson et al., 2005; Vaccari and Bilder, 2005) (this study). However, in *hrs* mosaics in *Drosophila*, non-autonomous cell proliferation has not been observed, although signaling receptors including N and DI accumulate in *hrs* clones (Jekely and Rorth, 2003; Lloyd et al., 2002). This is a puzzling observation as *hrs* encodes a class E Vps protein acting immediately upstream of the ESCRT complexes. It is possible that N and DI are not in an environment in the *hrs* endosome that permits signaling. Alternatively, Jekely and Rorth (Jekely and Rorth, 2003) showed that *hrs* controls the steady-state levels of non-activated receptors at the plasma membrane. Although this function may apply to *vps25*, it may also indicate that there are inherent differences between the different class E proteins regarding protein sorting at the early endosome.

### Suppression of *GMR-hid* by a non-autonomous increase of Diap1

Paradoxically, although *vps25* clones die by apoptosis, we identified the *vps25* alleles as being recessive suppressors of *GMR-hid*-induced cell death. Our analysis demonstrates that the wild-type tissue accounts for this suppression even though these cells are exposed to *GMR-hid*. Our initial explanation for this observation was that non-autonomous proliferation mediated by JAK/STAT signaling in *vps25* mosaics overrides the apoptotic activity of *GMR-hid*. However, overexpression of Upd, the ligand of the JAK/STAT pathway, does not significantly suppress *GMR-hid*, although *GMR-upd* flies have a similar overgrowth phenotype to *vps25* mosaics (Muller et al., 2005). This finding excludes non-autonomous proliferation for the suppression of *GMR-hid* by *vps25*. However, Diap1 protein levels are increased in tissue abutting *vps25* clones (Fig. 5D-F). *GMR-hid* is sensitive to altered levels of Diap1 (Hay et al., 1995), suggesting that the increase of Diap1 outside of *vps25* clones may account for the suppression of *GMR-hid*. Thus, in addition to non-autonomous proliferation, *vps25* clones also increase the apoptotic resistance of adjacent wild-type tissue in a non-autonomous manner. The signaling pathway that can induce non-autonomous survival by increasing Diap1 protein levels is currently unknown.

### Cell death in *vps25* clones

Our data suggests that apoptosis in *vps25* mutant tissue is not only executed via the Hid/Diap1/Dronc/Ark pathway. *vps25 ark* clones still died, suggesting that in addition to Ark at least one other cell death pathway is activated in *vps25* clones. We have shown previously that a Dronc/Ark-independent cell death pathway exists in *Drosophila*, but we did not identify this pathway (Srivastava et al., 2006; Xu et al., 2005). Our data here implicate JNK as potential

mediator of the alternative cell death pathway (Adachi-Yamada et al., 1999; Adachi-Yamada and O'Connor, 2002). *vps25 ark/Puc* mosaic eye discs are extremely overgrown and the clones occupy a large area of the disc. Caspase-3\*-dependent apoptosis is blocked in these clones. Only at the clonal boundaries is Caspase-3\* activity still detectable, suggesting that at the interface between *vps25* clones and wild-type tissue a third potential apoptotic pathway is activated.

Our data show that cell competition is not sufficient to induce cell death in *vps25* clones. By contrast, given the extremely large size of cell death-inhibited *vps25* clones (Fig. 6J), it appears that *vps25* clones have no intrinsic growth disadvantage, and have the capability to overgrow and outcompete the surrounding wild-type tissue if cell death is blocked. Thus, cell competition does not contribute significantly to the apoptotic phenotype of *vps25* clones.

We show that Hippo signaling is increased in *vps25* clones (reviewed by Edgar, 2006; Vidal and Cagan, 2006). Hippo signaling can induce cell death, and, consistently, *hippo* mutants block cell death in *vps25* clones. It is unknown how Hippo signaling is activated in *vps25* clones. However, in analogy to N, a putative receptor that controls Hippo signaling may be deregulated in *vps25* clones and triggers Hippo signaling. This receptor is currently unknown, but has been postulated previously (Hamaratoglu et al., 2006). However, it should be pointed out that ESCRT components have additional functions outside of MVB protein sorting. Certain ESCRT-II members have been shown to bind to the transcriptional elongation factor ELL in order to derepress transcription by RNA polymerase II (Kamura et al., 2001; Schmidt et al., 1999). Thus, in the absence of Vps25, transcriptional control of components of the Hippo pathway may be deregulated and contribute to cell death.

In summary, our data suggest that impaired ESCRT function leads to the accumulation of N and DI, and possibly of a receptor controlling the Hippo pathway. These receptors control non-autonomous proliferation and autonomous apoptosis, respectively. In addition, we postulate a signaling pathway that induces non-autonomous cell survival by controlling Diap1 protein levels. Further characterization of the *vps25* mutant phenotype may help to identify the postulated receptor of the Hippo pathway and the cell survival signaling pathway.

### *vps25*: a model for human cancer?

Human ESCRT components, most notably *TSG101* (Vps23p), have been implicated in tumor suppression. NIH3T3 cells, depleted of *Tsg101* by an antisense approach, formed colonies on soft agar and produced metastatic tumors in nude mice (Li and Cohen, 1996). However, the conditional *Tsg101* knockout in mouse mammary glands did not cause the formation of tumors over a period of two years, making a role of *TSG101* as tumor suppressor controversial (Wagner et al., 2003). However, *Tsg101* mutant cells are very sensitive to apoptotic death (Wagner et al., 2003), implying that they die before they become harmful to the organism.

The phenotypical characterization of *vps25* mutants in *Drosophila* provides an explanation for the failure to confirm *TSG101* as tumor suppressor. *vps25* clones need to survive over extended periods of time in order to sustain growth. Even though they induce non-autonomous proliferation, after they have died, N signaling is turned off and proliferation stops. Furthermore, the size of the adult eye of *vps25* mosaics is only slightly increased when compared with wild type, and does not match the strong overgrowth phenotype of larval imaginal discs, which can be twice as large as wild-type discs (Fig. 1G-I). Thus, as long as *vps25* clones are not resistant to their own apoptotic death, tissue repair during pupal stages may partially regress the size of the imaginal disc back to almost normal. Instead,



it appears that inhibition of cell death is the triggering event for a tumorous phenotype of *vps25* clones. *vps25/Diap1* and *vps25 ark/Puc* clones can make up a large fraction of the tissue of imaginal discs, and the entire discs can be five times as large as wild-type discs.

Tumorigenesis requires multiple genetic alterations that transform normal cells progressively into malignant cancer cells (Hanahan and Weinberg, 2000). Thus, additional genetic 'hits' may be necessary to inhibit apoptosis of *Tsg101* mutant cells, which may then be able to induce a similar growth phenotype to that observed for *vps25*. Thus, although a tumor suppressor function for *Tsg101* was not confirmed in a mouse model, it still is possible that *Tsg101* and other mammalian ESCRT members have tumor suppressor properties.

We thank Georg Halder and Jennifer Childress for advice and reagents; David Stein, Hermann Steller, Hyung-Don Ryoo, Hugo Bellen, Graeme Mardon, David Bilder, Richard Sorrentino and the Bloomington stock center for fly stocks and antibodies; and the MD Anderson DNA Analysis Core Facility for sequencing (supported by Core Grant #CA16672 from the NCI). A.B. is a fellow of the MD Anderson Research Trust. This work was supported by grants from the NIH (GM068016) and the Robert A. Welch Foundation (G1496) to A.B.

## References

- Abrams, J. M.** (2002). Competition and compensation: coupled to death in development and cancer. *Cell* **110**, 403-406.
- Adachi-Yamada, T. and O'Connor, M. B.** (2002). Morphogenetic apoptosis: a mechanism for correcting discontinuities in morphogen gradients. *Dev. Biol.* **251**, 74-90.
- Adachi-Yamada, T., Fujimura-Kamada, K., Nishida, Y. and Matsumoto, K.** (1999). Distortion of proximodistal information causes JNK-dependent apoptosis in *Drosophila* wing. *Nature* **400**, 166-169.
- Babst, M.** (2005). A protein's final ESCRT. *Traffic* **6**, 2-9.
- Bergmann, A., Yang, A. Y. and Srivastava, M.** (2003). Regulators of IAP function: coming to grips with the grim reaper. *Curr. Opin. Cell Biol.* **15**, 717-724.
- Brown, S., Hu, N. and Hombria, J. C.** (2001). Identification of the first invertebrate interleukin JAK/STAT receptor, the *Drosophila* gene domeless. *Curr. Biol.* **11**, 1700-1705.
- Cashio, P., Lee, T. V. and Bergmann, A.** (2005). Genetic control of programmed cell death in *Drosophila melanogaster*. *Semin. Cell Dev. Biol.* **16**, 225-235.
- Chao, J. L., Tsai, Y. C., Chiu, S. J. and Sun, Y. H.** (2004). Localized Notch signal acts through *eyg* and *upd* to promote global growth in *Drosophila* eye. *Development* **131**, 3839-3847.
- de Gassart, A., Geminard, C., Hoekstra, D. and Vidal, M.** (2004). Exosome secretion: the art of reutilizing nonrecycled proteins? *Traffic* **5**, 896-903.
- de la Cova, C., Abril, M., Bellosta, P., Gallant, P. and Johnston, L. A.** (2004). *Drosophila* myc regulates organ size by inducing cell competition. *Cell* **117**, 107-116.
- Demirov, D. G. and Freed, E. O.** (2004). Retrovirus budding. *Virus Res.* **106**, 87-102.
- Edgar, B. A.** (2006). From cell structure to transcription: hippo forges a new path. *Cell* **124**, 267-273.
- Felder, S., Miller, K., Moehren, G., Ullrich, A., Schlessinger, J. and Hopkins, C. R.** (1990). Kinase activity controls the sorting of the epidermal growth factor receptor within the multivesicular body. *Cell* **61**, 623-634.
- Gonzalez-Gaitan, M.** (2003). Signal dispersal and transduction through the endocytic pathway. *Nat. Rev. Mol. Cell Biol.* **4**, 213-224.
- Grether, M. E., Abrams, J. M., Agapite, J., White, K. and Steller, H.** (1995). The head involution defective gene of *Drosophila melanogaster* functions in programmed cell death. *Genes Dev.* **9**, 1694-1708.
- Gruenberg, J. and Stenmark, H.** (2004). The biogenesis of multivesicular endosomes. *Nat. Rev. Mol. Cell Biol.* **5**, 317-323.
- Haglund, K. and Dikic, I.** (2005). Ubiquitylation and cell signaling. *EMBO J.* **24**, 3353-3359.
- Hamaratoglu, F., Willecke, M., Kango-Singh, M., Nolo, R., Hyun, E., Tao, C., Jafar-Nejad, H. and Halder, G.** (2006). The tumour-suppressor genes NF2/Merlin and Expanded act through Hippo signalling to regulate cell proliferation and apoptosis. *Nat. Cell Biol.* **8**, 27-36.
- Hanahan, D. and Weinberg, R. A.** (2000). The hallmarks of cancer. *Cell* **100**, 57-70.
- Harrison, D. A., McCoon, P. E., Binari, R., Gilman, M. and Perrimon, N.** (1998). *Drosophila* unpaired encodes a secreted protein that activates the JAK signaling pathway. *Genes Dev.* **12**, 3252-3263.
- Harvey, K. F., Pfleger, C. M. and Hariharan, I. K.** (2003). The *Drosophila* Mst ortholog, hippo, restricts growth and cell proliferation and promotes apoptosis. *Cell* **114**, 457-467.
- Hay, B. A., Wassarman, D. A. and Rubin, G. M.** (1995). *Drosophila* homologs of baculovirus inhibitor of apoptosis proteins function to block cell death. *Cell* **83**, 1253-1262.
- Hicke, L. and Dunn, R.** (2003). Regulation of membrane protein transport by ubiquitin and ubiquitin-binding proteins. *Annu. Rev. Cell Dev. Biol.* **19**, 141-172.
- Hierro, A., Sun, J., Ruskak, A. S., Kim, J., Prag, G., Emr, S. D. and Hurley, J. H.** (2004). Structure of the ESCRT-II endosomal trafficking complex. *Nature* **431**, 221-225.
- Holley, C. L., Olson, M. R., Colon-Ramos, D. A. and Kornbluth, S.** (2002). Reaper eliminates IAP proteins through stimulated IAP degradation and generalized translational inhibition. *Nat. Cell Biol.* **4**, 439-444.
- Huh, J. R., Guo, M. and Hay, B. A.** (2004). Compensatory proliferation induced by cell death in the *Drosophila* wing disc requires activity of the apical cell death caspase Dronc in a nonapoptotic role. *Curr. Biol.* **14**, 1262-1266.
- Jekely, G. and Rorth, P.** (2003). Hrs mediates downregulation of multiple signalling receptors in *Drosophila*. *EMBO Rep.* **4**, 1163-1168.
- Kamura, T., Burian, D., Khalili, H., Schmidt, S. L., Sato, S., Liu, W. J., Conrad, M. N., Conaway, R. C., Conaway, J. W. and Shilatifard, A.** (2001). Cloning and characterization of ELL-associated proteins EAP45 and EAP20. a role for yeast EAP-like proteins in regulation of gene expression by glucose. *J. Biol. Chem.* **276**, 16528-16533.
- Katzmann, D. J., Odorizzi, G. and Emr, S. D.** (2002). Receptor downregulation and multivesicular-body sorting. *Nat. Rev. Mol. Cell Biol.* **3**, 893-905.
- Krempler, A., Henry, M. D., Triplett, A. A. and Wagner, K. U.** (2002). Targeted deletion of the *Tsg101* gene results in cell cycle arrest at G1/S and p53-independent cell death. *J. Biol. Chem.* **277**, 43216-43223.
- Kuranaga, E., Kanuka, H., Igaki, T., Sawamoto, K., Ichijo, H., Okano, H. and Miura, M.** (2002). Reaper-mediated inhibition of DIAP1-induced DTRAF1 degradation results in activation of JNK in *Drosophila*. *Nat. Cell Biol.* **4**, 705-710.
- Le Borgne, R., Bardin, A. and Schweisguth, F.** (2005). The roles of receptor and ligand endocytosis in regulating Notch signaling. *Development* **132**, 1751-1762.
- Le Roy, C. and Wrana, J. L.** (2005). Signaling and endocytosis: a team effort for cell migration. *Dev. Cell* **9**, 167-168.
- Lee, T. and Luo, L.** (2001). Mosaic analysis with a repressible cell marker (MARCM) for *Drosophila* neural development. *Trends Neurosci.* **24**, 251-254.
- Lewis, E. B. and Bacher, F.** (1968). Method of feeding ethyl methanesulfonate (EMS) to *Drosophila* males. *Drosoph. Inf. Serv.* **43**, 193.
- Li, L. and Cohen, S. N.** (1996). *Tsg101*: a novel tumor susceptibility gene isolated by controlled homozygous functional knockout of allelic loci in mammalian cells. *Cell* **85**, 319-329.
- Li, L., Li, X., Francke, U. and Cohen, S. N.** (1997). The *TSG101* tumor susceptibility gene is located in chromosome 11 band p15 and is mutated in human breast cancer. *Cell* **88**, 143-154.
- Lin, S. Y., Chen, Y. J. and Chang, J. G.** (1998). Multiple truncated transcripts of *TSG101* in gastrointestinal cancers. *J. Gastroenterol. Hepatol.* **13**, 1111-1114.
- Lloyd, T. E., Atkinson, R., Wu, M. N., Zhou, Y., Pennetta, G. and Bellen, H. J.** (2002). Hrs regulates endosome membrane invagination and tyrosine kinase receptor signaling in *Drosophila*. *Cell* **108**, 261-269.
- Meier, P., Silke, J., Leever, S. J. and Evan, G. I.** (2000). The *Drosophila* caspase DRONC is regulated by DIAP1. *EMBO J.* **19**, 598-611.
- Miller, D. T. and Cagan, R. L.** (1998). Local induction of patterning and programmed cell death in the developing *Drosophila* retina. *Development* **125**, 2327-2335.
- Moberg, K. H., Schelble, S., Burdick, S. K. and Hariharan, I. K.** (2005). Mutations in *erupted*, the *Drosophila* ortholog of mammalian tumor susceptibility gene 101, elicit non-cell-autonomous overgrowth. *Dev. Cell* **9**, 699-710.
- Moreno, E. and Basler, K.** (2004). dMyc transforms cells into super-competitors. *Cell* **117**, 117-129.
- Muller, P., Kuttenkeuler, D., Gesellchen, V., Zeidler, M. P. and Boutros, M.** (2005). Identification of JAK/STAT signalling components by genome-wide RNA interference. *Nature* **436**, 871-875.
- Newsome, T. P., Asling, B. and Dickson, B. J.** (2000). Analysis of *Drosophila* photoreceptor axon guidance in eye-specific mosaics. *Development* **127**, 851-860.
- Odorizzi, G., Babst, M. and Emr, S. D.** (1998). Fab1p PtdIns(3)P 5-kinase function essential for protein sorting in the multivesicular body. *Cell* **95**, 847-858.
- Pantalacci, S., Tapon, N. and Leopold, P.** (2003). The Salvador partner Hippo promotes apoptosis and cell-cycle exit in *Drosophila*. *Nat. Cell Biol.* **5**, 921-927.
- Perez-Garjjo, A., Martin, F. A. and Morata, G.** (2004). Caspase inhibition during apoptosis causes abnormal signalling and developmental aberrations in *Drosophila*. *Development* **131**, 5591-5598.
- Pornillos, O., Garrus, J. E. and Sundquist, W. I.** (2002). Mechanisms of enveloped RNA virus budding. *Trends Cell Biol.* **12**, 569-579.
- Raiborg, C., Rusten, T. E. and Stenmark, H.** (2003). Protein sorting into multivesicular endosomes. *Curr. Opin. Cell Biol.* **15**, 446-455.
- Raymond, C. K., Howald-Stevenson, I., Vater, C. A. and Stevens, T. H.** (1992). Morphological classification of the yeast vacuolar protein sorting mutants:

- evidence for a prevacuolar compartment in class E vps mutants. *Mol. Biol. Cell* **3**, 1389-1402.
- Reynolds-Kenneally, J. and Mlodzik, M.** (2005). Notch signaling controls proliferation through cell-autonomous and non-autonomous mechanisms in the *Drosophila* eye. *Dev. Biol.* **285**, 38-48.
- Ryoo, H. D., Bergmann, A., Gonen, H., Ciechanover, A. and Steller, H.** (2002). Regulation of *Drosophila* IAP1 degradation and apoptosis by reaper and ubcD1. *Nat. Cell Biol.* **4**, 432-438.
- Ryoo, H. D., Gorenc, T. and Steller, H.** (2004). Apoptotic cells can induce compensatory cell proliferation through the JNK and the Wingless signaling pathways. *Dev. Cell* **7**, 491-501.
- Schmidt, A. E., Miller, T., Schmidt, S. L., Shiekhatar, R. and Shilatifard, A.** (1999). Cloning and characterization of the EAP30 subunit of the ELL complex that confers derepression of transcription by RNA polymerase II. *J. Biol. Chem.* **274**, 21981-21985.
- Sen, A., Reddy, G. V. and Rodrigues, V.** (2003). Combinatorial expression of Prospero, Seven-up, and Elav identifies progenitor cell types during sense-organ differentiation in the *Drosophila* antenna. *Dev. Biol.* **254**, 79-92.
- Seto, E. S. and Bellen, H. J.** (2004). The ins and outs of Wingless signaling. *Trends Cell Biol.* **14**, 45-53.
- Srivastava, M., Scherr, M., Lackey, M., Xu, D., Chen, Z., Lu, J. and Bergmann, A.** (2006). ARK, the Apaf-1 related killer in *Drosophila*, requires diverse domains for its apoptotic activity. *Cell Death Diff.* In press.
- Sun, Z., Pan, J., Bublely, G. and Balk, S. P.** (1997). Frequent abnormalities of TSG101 transcripts in human prostate cancer. *Oncogene* **15**, 3121-3125.
- Teo, H., Perisic, O., Gonzalez, B. and Williams, R. L.** (2004). ESCRT-II, an endosome-associated complex required for protein sorting: crystal structure and interactions with ESCRT-III and membranes. *Dev. Cell* **7**, 559-569.
- Thompson, B. J., Mathieu, J., Sung, H. H., Loeser, E., Rorth, P. and Cohen, S. M.** (2005). Tumor suppressor properties of the ESCRT-II complex component Vps25 in *Drosophila*. *Dev. Cell* **9**, 711-720.
- Tsai, Y. C. and Sun, Y. H.** (2004). Long-range effect of upd, a ligand for Jak/STAT pathway, on cell cycle in *Drosophila* eye development. *Genesis* **39**, 141-153.
- Udan, R. S., Kango-Singh, M., Nolo, R., Tao, C. and Halder, G.** (2003). Hippo promotes proliferation arrest and apoptosis in the Salvador/Warts pathway. *Nat. Cell Biol.* **5**, 914-920.
- Vaccari, T. and Bilder, D.** (2005). The *Drosophila* tumor suppressor vps25 prevents nonautonomous overproliferation by regulating notch trafficking. *Dev. Cell* **9**, 687-698.
- Vidal, M. and Cagan, R. L.** (2006). *Drosophila* models for cancer research. *Curr. Opin. Genet. Dev.* **16**, 10-16.
- Wagner, K. U., Krempler, A., Qi, Y., Park, K., Henry, M. D., Triplett, A. A., Riedlinger, G., Rucker, I. E. and Hennighausen, L.** (2003). Tsg101 is essential for cell growth, proliferation, and cell survival of embryonic and adult tissues. *Mol. Cell. Biol.* **23**, 150-162.
- Wu, S., Huang, J., Dong, J. and Pan, D.** (2003). hippo encodes a Ste-20 family protein kinase that restricts cell proliferation and promotes apoptosis in conjunction with salvador and warts. *Cell* **114**, 445-456.
- Xu, D., Li, Y., Arcaro, M., Lackey, M. and Bergmann, A.** (2005). The CARD-carrying caspase Dronc is essential for most, but not all, developmental cell death in *Drosophila*. *Development* **132**, 2125-2134.
- Xu, T. and Rubin, G. M.** (1993). Analysis of genetic mosaics in developing and adult *Drosophila* tissues. *Development* **117**, 1223-1237.
- Yoo, S. J., Huh, J. R., Muro, I., Yu, H., Wang, L., Wang, S. L., Feldman, R. M., Clem, R. J., Muller, H. A. and Hay, B. A.** (2002). Hid, Rpr and Grim negatively regulate DIAP1 levels through distinct mechanisms. *Nat. Cell Biol.* **4**, 416-424.
- Zhai, R. G., Hiesinger, P. R., Koh, T. W., Verstreken, P., Schulze, K. L., Cao, Y., Jafar-Nejad, H., Norga, K. K., Pan, H., Bayat, V. et al.** (2003). Mapping *Drosophila* mutations with molecularly defined P element insertions. *Proc. Natl. Acad. Sci. USA* **100**, 10860-10865.
